# Supplementary material
Source: PubMed Central journal article supplement (PMC7965291)
Supplement: 14-00492.pdf [file 14-00492.pdf]

**On-line Table: Age, sex, and clinical diagnosis along with average SUVR  $\pm$  SD and assessment for  $\beta$ -amyloid deposition with and without SUVR**

| Age (yr) | Sex    | Clinical Diagnosis | Average of Readers' Composite Regional SUVR, SD | Qualitative Assessment for Cortical $\beta$ -Amyloid Deposition | Assessment for Cortical $\beta$ -Amyloid Deposition with the Aid of Semiquantitative Indices |
|----------|--------|--------------------|-------------------------------------------------|-----------------------------------------------------------------|----------------------------------------------------------------------------------------------|
| 72       | Female | Normal             | — <sup>a</sup>                                  | 4 Positive and 1 negative                                       | 4 Positive and 1 negative                                                                    |
| 94       | Female | Normal             | 0.97, 0.02                                      | All negative                                                    | All negative                                                                                 |
| 92       | Female | Normal             | 0.90, 0.04                                      | All negative                                                    | All negative                                                                                 |
| 77       | Male   | Normal             | 1.46, 0.06                                      | All positive                                                    | All positive                                                                                 |
| 78       | Male   | Normal             | 0.84, 0.02                                      | 3 Positive and 2 negative                                       | All negative                                                                                 |
| 84       | Male   | Normal             | 1.06, 0.02                                      | All negative                                                    | All negative                                                                                 |
| 90       | Male   | Normal             | 1.05, 0.04                                      | All negative                                                    | All negative                                                                                 |
| 74       | Male   | EMCI               | 0.90, 0.03                                      | All negative                                                    | All negative                                                                                 |
| 82       | Female | EMCI               | 1.66, 0.04                                      | All positive                                                    | All positive                                                                                 |
| 58       | Female | EMCI               | 1.03, 0.03                                      | 4 Negative and 1 positive                                       | All negative                                                                                 |
| 66       | Male   | EMCI               | 1.29, 0.03                                      | 4 Positive and 1 negative                                       | All positive                                                                                 |
| 55       | Female | EMCI               | 1.09, 0.03                                      | All negative                                                    | All negative                                                                                 |
| 80       | Female | EMCI               | 1.33, 0.05                                      | 4 Positive and 1 negative                                       | All positive                                                                                 |
| 71       | Female | EMCI               | 1.60, 0.04                                      | All positive                                                    | All positive                                                                                 |
| 77       | Male   | EMCI               | 1.56, 0.03                                      | All positive                                                    | All positive                                                                                 |
| 69       | Male   | EMCI               | 0.99, 0.02                                      | 3 Negative and 2 positive                                       | All negative                                                                                 |
| 69       | Male   | EMCI               | 1.10, 0.04                                      | All negative                                                    | All negative                                                                                 |
| 75       | Male   | EMCI               | 1.54, 0.08                                      | All positive                                                    | All positive                                                                                 |
| 82       | Female | EMCI               | 1.27, 0.05                                      | 3 Negative and 2 positive                                       | 4 Positive and 1 negative                                                                    |
| 64       | Female | EMCI               | 1.15, 0.04                                      | All negative                                                    | 1 Positive and 4 negative                                                                    |
| 85       | Male   | LMCI               | 0.91, 0.03                                      | 4 Negative and 1 positive                                       | All negative                                                                                 |
| 78       | Male   | LMCI               | 1.61, 0.05                                      | All positive                                                    | All positive                                                                                 |
| 87       | Male   | LMCI               | 1.43, 0.07                                      | All positive                                                    | All positive                                                                                 |
| 78       | Male   | LMCI               | 1.34, 0.05                                      | 4 Positive and 1 negative                                       | All positive                                                                                 |
| 81       | Male   | LMCI               | 1.50, 0.04                                      | All positive                                                    | All positive                                                                                 |
| 77       | Male   | LMCI               | 1.1, 0.04                                       | 4 Negative and 1 positive                                       | All negative                                                                                 |
| 84       | Male   | EAD                | 1.77, 0.03                                      | All positive                                                    | All positive                                                                                 |
| 89       | Male   | EAD                | 1.76, 0.07                                      | All positive                                                    | All positive                                                                                 |
| 82       | Female | EAD                | 1.3, 0.03                                       | All positive                                                    | All positive                                                                                 |
| 59       | Female | EAD                | 1.78, 0.02                                      | All positive                                                    | All positive                                                                                 |

<sup>a</sup> No SUVR value could be determined because input images could not be successfully registered to the template for quantification due to nonstandard patient positioning. The readers could only provide qualitative interpretation for both the qualitative and qualitative + SUVR reads.
